# Supplementary material
Source: PubMed Central journal article supplement (PMC2652383)

**a**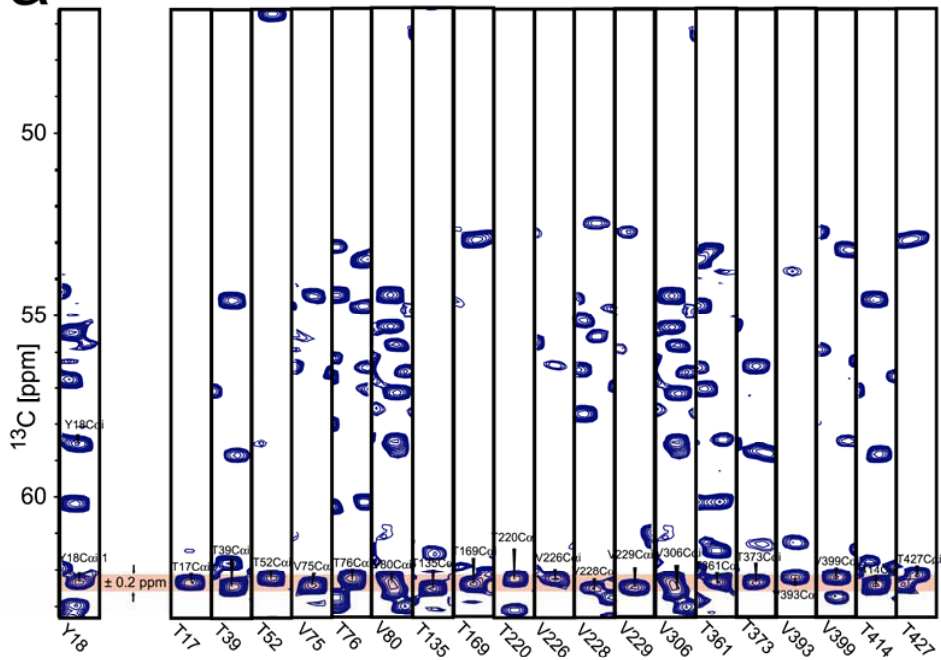**b**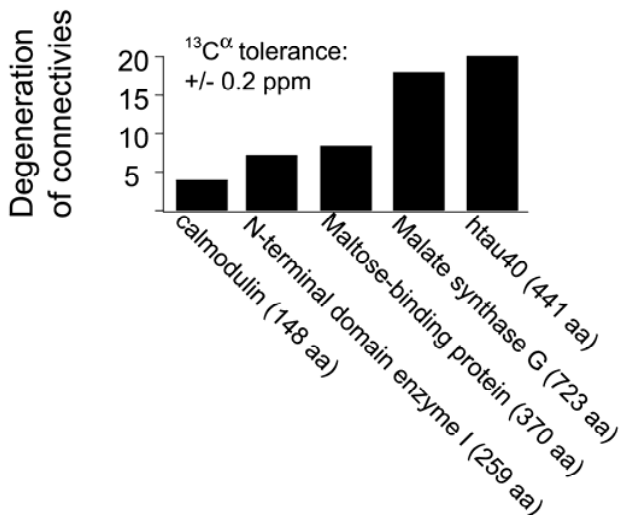

Supplement: pbio.1000034.sg001.pdf [file pbio.1000034.sg001.pdf]

**a**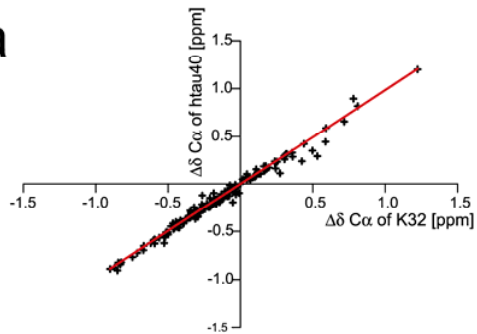**b**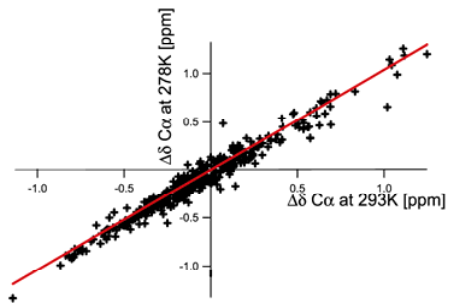**c**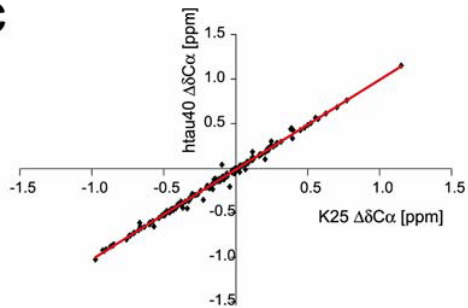**d**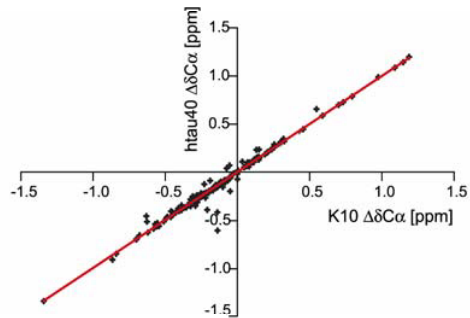

Supplement: pbio.1000034.sg002.pdf [file pbio.1000034.sg002.pdf]

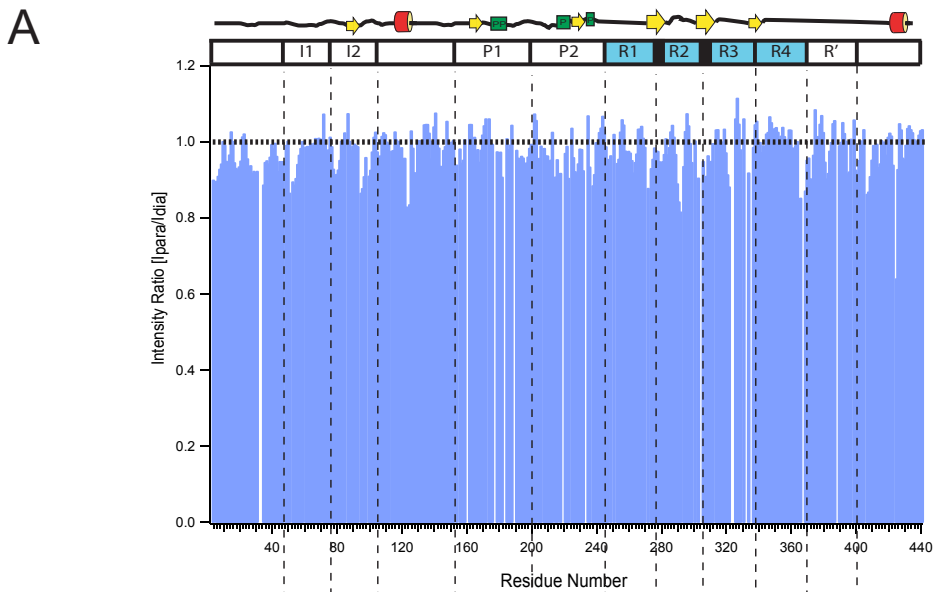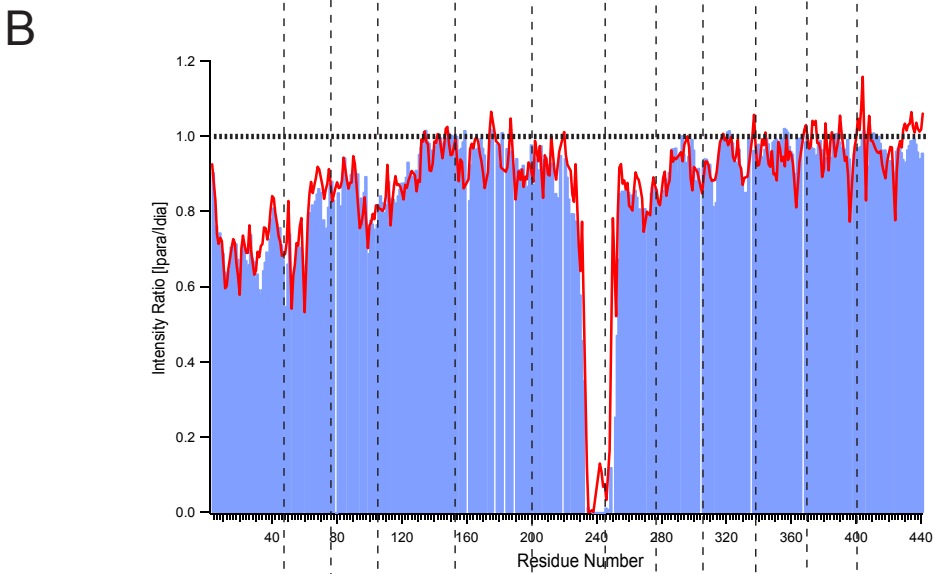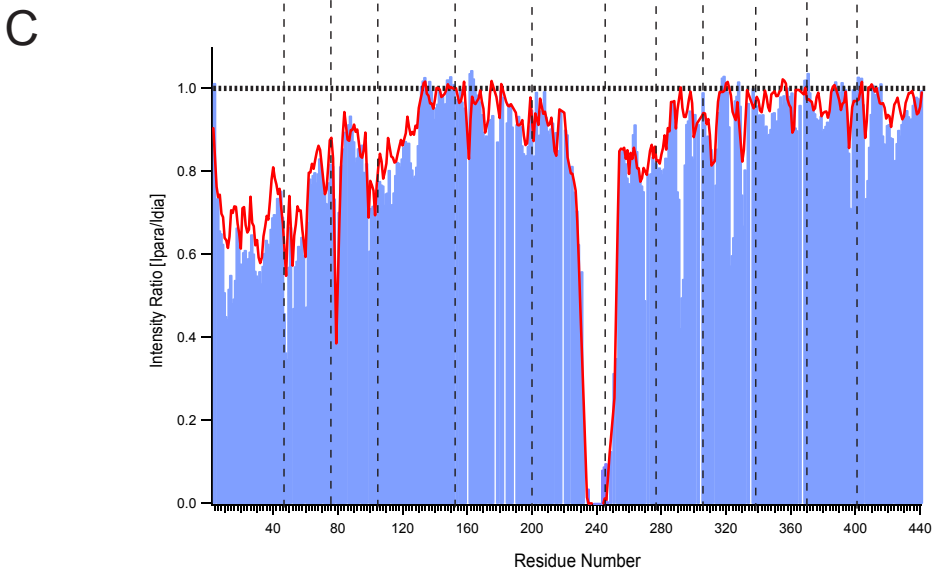

Supplement: pbio.1000034.sg003.pdf [file pbio.1000034.sg003.pdf]
